# Supplementary material for: A ground temperature map of the North Atlantic permafrost region based on remote sensing and reanalysis data
Source: Copernicus journal article supplement (doi:10.5194/tc-9-1303-2015), 2015-06-23
Supplement: Supplementary file [file tc-9-1303-2015-supplement.pdf]

Supplement of The Cryosphere, 9, 1303–1319, 2015  
<http://www.the-cryosphere.net/9/1303/2015/>  
doi:10.5194/tc-9-1303-2015-supplement  
© Author(s) 2015. CC Attribution 3.0 License.

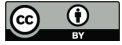

*Supplement of*

## **A ground temperature map of the North Atlantic permafrost region based on remote sensing and reanalysis data**

**S. Westermann et al.**

*Correspondence to:* S. Westermann ([sebastian.westermann@geo.uio.no](mailto:sebastian.westermann@geo.uio.no))

The copyright of individual parts of the supplement might differ from the CC-BY 3.0 licence.

Gridded data sets (mean and standard deviation of MAGT of all model realizations; fraction of model realizations with MAGT<0°C) are available at <http://dx.doi.org/10.11582/2015.00016>

|    | Borehole Name        | Country Borehole ID | Latitude | Longitude | measured GT | modeled GT |     | difference |
|----|----------------------|---------------------|----------|-----------|-------------|------------|-----|------------|
|    |                      |                     |          |           |             | mean       | std |            |
| 1  | Alert 1              | CA 42               | 82.500   | -62.417   | -10.9       | -14.4      | 2.7 | 3.5        |
| 2  | Alert 2              | CA 43               | 82.500   | -62.417   | -15.0       | -14.4      | 2.7 | -0.6       |
| 3  | Alert 3              | CA 44               | 82.500   | -62.417   | -13.7       | -14.4      | 2.7 | 0.7        |
| 4  | Alert 4              | CA 45               | 82.500   | -62.417   | -13.2       | -14.4      | 2.7 | 1.2        |
| 5  | Alert 5              | CA 46               | 82.500   | -62.417   | -13.7       | -14.4      | 2.7 | 0.7        |
| 6  | Bylot Pp             | CA 67               | 73.156   | -79.956   | -10.8       | -12.2      | 2.7 | 1.4        |
| 7  | Pangnirtung          | CA 68               | 65.715   | -68.144   | -5.2        | -5.1       | 1.9 | -0.1       |
| 8  | Arctic Bay           | CA 162              | 73.033   | -85.167   | -10.6       | -10.8      | 2.4 | 0.2        |
| 9  | Clyde River          | CA 163              | 70.468   | -68.594   | -7.2        | -8.8       | 2.2 | 1.6        |
| 10 | Igloolik             | CA 164              | 69.383   | -81.800   | -8.5        | -8.9       | 2.3 | 0.4        |
| 11 | Pond Inlet           | CA 165              | 72.700   | -77.961   | -8.5        | -10.9      | 2.3 | 2.4        |
| 12 | Resolute Bay         | CA 166              | 74.683   | -94.833   | -12.3       | -11.9      | 2.4 | -0.4       |
| 13 | Va-1 Vaisjeaggi1*    | FN 01               | 69.821   | 27.173    | -0.2        | 0.6        | 0.4 | -0.8       |
| 14 | Hagöngur*            | IL 02               | 64.556   | -18.242   | 0.0         | -1.1       | 1.1 | 1.1        |
| 15 | Saudafell*           | IL 03               | 64.884   | -15.500   | -0.5        | 0.3        | 0.9 | -0.8       |
| 16 | Gagnheidi*           | IL 04               | 65.224   | -14.260   | -0.3        | 0.3        | 0.7 | -0.6       |
| 17 | NUK04008-808a*       | GL DK US 01         | 64.167   | -51.667   | 0.2         | 1.0        | 0.3 | -0.8       |
| 18 | NUK04008-808b*       | GL DK US 02         | 64.167   | -51.667   | -0.9        | 1.0        | 0.3 | -1.9       |
| 19 | SIS2007-06*          | GL DK US 03         | 66.936   | -53.645   | -1.1        | -0.9       | 0.9 | -0.2       |
| 20 | SIS2007-06a*         | GL DK US 04         | 66.936   | -53.645   | -1.1        | -0.9       | 0.9 | -0.2       |
| 21 | ILU2007-01*          | GL DK US 05         | 69.219   | -51.098   | -3.5        | -1.9       | 0.8 | -1.6       |
| 22 | KAN2005-01*          | GL DK US 06         | 67.006   | -50.703   | -1.6        | -2.5       | 1.4 | 0.9        |
| 23 | Thule                | GL US 08            | 76.529   | -68.689   | -9.4        | -8.0       | 2.1 | -1.4       |
| 24 | ZC 1 Zackenberg      | GL NO 11            | 74.473   | -20.553   | -8.1        | -6.9       | 2.5 | -1.2       |
| 25 | La-B-1* Lavkavagge   | NO 01               | 69.249   | 20.445    | 0.2         | 0.4        | 0.4 | -0.2       |
| 26 | Gu-B-1* Guolasjavi   | NO 02               | 69.354   | 21.211    | -0.1        | -0.1       | 0.4 | 0.0        |
| 27 | Is-B-1* Iskoras      | NO 03               | 69.302   | 25.336    | -0.2        | 0.3        | 0.4 | -0.5       |
| 28 | Is-B-2* Iskoras PYRN | NO 04               | 69.300   | 25.346    | -0.3        | 0.4        | 0.4 | -0.7       |
| 29 | Ki-B-1* Kistefjellet | NO 05               | 69.291   | 18.130    | 0.9         | 0.1        | 0.8 | 0.8        |
| 30 | La-B-2 Lavkavagge    | NO 06               | 69.239   | 20.493    | 2.0         | 0.6        | 0.4 | 1.4        |
| 31 | La-B-3 Lavkavagge    | NO 07               | 69.224   | 20.580    | 2.0         | 1.1        | 0.4 | 0.9        |
| 32 | Gu-B-2 Guolasjavi    | NO 08               | 69.366   | 21.168    | 1.4         | 0.0        | 0.4 | 1.4        |
| 33 | Gu-B-3 Guolasjavi    | NO 09               | 69.356   | 21.061    | 1.0         | 0.1        | 0.4 | 0.9        |
| 34 | Ab-B-1 Abojavri      | NO 10               | 69.642   | 22.194    | -0.5        | -1.0       | 1.0 | 0.5        |
| 35 | Ab-B-2 Abojavri      | NO 11               | 69.681   | 22.126    | 1.2         | 0.9        | 0.4 | 0.3        |
| 36 | NO-B-1 Nordnes       | NO 14               | 69.556   | 20.420    | 0.8         | 1.4        | 0.3 | -0.6       |
| 37 | NO-B-2 Nordnes       | NO 15               | 69.556   | 20.420    | 0.0         | 1.4        | 0.3 | -1.4       |
| 38 | NO-B-3 Nordnes       | NO 16               | 69.557   | 20.434    | -0.9        | 0.0        | 0.8 | -0.9       |
| 39 | Jet-BH1* Jetta       | NO 19               | 61.901   | 9.285     | -0.7        | -0.7       | 1.1 | 0.0        |
| 40 | Tro-BH1* Tron        | NO 20               | 62.174   | 10.702    | 0.0         | -1.0       | 0.9 | 1.0        |
| 41 | Juv-BH1* Juvvass     | NO 21               | 61.676   | 8.365     | -1.6        | -1.9       | 1.6 | 0.3        |
| 42 | Juv-BH2* Juvvass     | NO 22               | 61.684   | 8.372     | -1.1        | -1.3       | 1.5 | 0.2        |
| 43 | Juv-BH3* Juvvass     | NO 23               | 61.697   | 8.386     | -0.3        | -0.8       | 1.4 | 0.5        |
| 44 | PACE31* Juvvasshøe   | NO 24               | 61.676   | 8.368     | -2.5        | -1.9       | 1.6 | -0.6       |
| 45 | DB1* Dovrefjell      | NO 25               | 62.250   | 9.333     | -0.1        | -0.7       | 1.2 | 0.6        |
| 46 | Da1* Dalsnibba       | NO 26               | 62.048   | 7.271     | 0.9         | 0.2        | 1.1 | 0.7        |
| 47 | Jet-BH3* Jetta       | NO 27               | 61.902   | 9.234     | 1.6         | -0.5       | 1.1 | 2.1        |
| 48 | Jet-BH2 Jetta        | NO 28               | 61.902   | 9.234     | 0.6         | -0.5       | 1.1 | 1.1        |
| 49 | Tro-BH2 Tron         | NO 29               | 62.170   | 10.703    | 0.9         | -1.0       | 0.9 | 1.9        |
| 50 | Tro-BH3 Tron         | NO 30               | 62.151   | 10.715    | 1.4         | -0.2       | 0.8 | 1.6        |
| 51 | Juv-BH5 Juvvass      | NO 32               | 61.701   | 8.392     | 1.3         | 1.5        | 0.3 | -0.2       |
| 52 | Juv-BH6 Juvvass      | NO 33               | 61.707   | 8.403     | 1.6         | 2.0        | 0.3 | -0.4       |
| 53 | PACE 30 Juvvasshoe   | NO 34               | 61.683   | 8.367     | -2.5        | -1.9       | 1.6 | -0.6       |
| 54 | KL-B-1* Kapp Linne   | NO 35               | 78.056   | 13.635    | -3.1        | -1.9       | 0.9 | -1.2       |
| 55 | KL-B-2* Kapp Linne   | NO 36               | 78.054   | 13.637    | -3.2        | -1.9       | 0.7 | -1.3       |
| 56 | KL-B-3* Kapp Linne   | NO 37               | 78.053   | 13.640    | -3.4        | -1.9       | 0.7 | -1.5       |
| 57 | NA-B-1* Ny-Ålesund   | NO 38               | 78.922   | 11.932    | -2.3        | -4.0       | 1.5 | 1.7        |
| 58 | GF-B-1* Gruvefjellet | NO 39               | 78.197   | 15.632    | -5.3        | -4.3       | 1.7 | -1.0       |

|     |                                  |                |        |        |      |      |     |      |
|-----|----------------------------------|----------------|--------|--------|------|------|-----|------|
| 59  | EN-B-1* Endalen PYRN             | NO 40          | 78.190 | 15.782 | -3.2 | -3.9 | 1.6 | 0.7  |
| 60  | AS-B-2* Old Auroral Station PYRN | NO 41          | 78.201 | 15.835 | -5.6 | -3.9 | 1.6 | -1.7 |
| 61  | Pace* Janssonhaugen1(1099)       | NO 44          | 78.183 | 16.467 | -5.2 | -3.9 | 1.7 | -1.3 |
| 62  | SV-B-2* Svea                     | NO 45          | 77.878 | 16.772 | -3.3 | -3.1 | 1.4 | -0.2 |
| 63  | SV-B-5* Svea                     | NO 46          | 77.882 | 16.795 | -4.5 | -3.7 | 1.6 | -0.8 |
| 64  | IP-B-1 Innerhytte pingo          | NO 49          | 78.189 | 16.344 | -4.4 | -4.0 | 1.7 | -0.4 |
| 65  | AS-B-1 Old Auroral Station       | NO 50          | 78.201 | 15.826 | -6.0 | -3.8 | 1.6 | -2.2 |
| 66  | SV-1 Svea                        | NO 54          | 77.886 | 16.767 | -2.5 | -3.1 | 1.4 | 0.6  |
| 67  | SV-4 Svea                        | NO 55          | 77.874 | 16.813 | -4.7 | -3.1 | 1.4 | -1.6 |
| 68  | Dh1-CO2-07                       | NO 56          | 78.236 | 15.547 | -0.8 | -1.4 | 1.3 | 0.6  |
| 69  | Dh2-CO2-07                       | NO 57          | 78.236 | 15.546 | 0.0  | -1.4 | 0.5 | 1.4  |
| 70  | Janssonhaugen PACE 10            | NO 59          | 78.183 | 16.467 | -5.2 | -3.9 | 1.7 | -1.3 |
| 71  | Ny Ålesund                       | NO GE 60       | 78.921 | 11.833 | -2.9 | -3.9 | 1.5 | 1.0  |
| 72  | Huset rock glacier               | NO JP 61       | 78.209 | 15.587 | -4.0 | -4.5 | 1.7 | 0.5  |
| 73  | Bovanenkovo 1                    | RU 03 02_0001  | 68.408 | 70.398 | -5.9 | -2.2 | 0.7 | -3.7 |
| 74  | 1*                               | RU 12 03_0008  | 69.714 | 66.814 | -4.7 | -4.4 | 1.6 | -0.3 |
| 75  | 3                                | RU 13 03_0009  | 69.716 | 66.813 | -5.4 | -4.4 | 1.6 | -1.0 |
| 76  | 17                               | RU 14 03_0011  | 69.715 | 66.818 | -5.0 | -4.8 | 1.7 | -0.2 |
| 77  | 43                               | RU 15 03_0013  | 69.709 | 66.834 | -5.0 | -4.8 | 1.7 | -0.2 |
| 78  | 59*                              | RU 16 03_0016  | 68.288 | 54.499 | -1.8 | -0.7 | 0.5 | -1.1 |
| 79  | 55*                              | RU 17 03_0017  | 68.290 | 54.503 | -1.3 | -0.7 | 0.5 | -0.6 |
| 80  | 54*                              | RU 18 03_0018  | 68.284 | 54.505 | -2.0 | -2.5 | 1.3 | 0.5  |
| 81  | 61*                              | RU 19 03_0019  | 68.287 | 54.495 | 0.5  | -0.7 | 0.5 | 1.2  |
| 82  | 83*                              | RU 22 03_0022  | 68.285 | 54.483 | -2.0 | -0.6 | 0.5 | -1.4 |
| 83  | 56*                              | RU 23 03_0023  | 68.290 | 54.506 | -0.6 | -0.7 | 0.5 | 0.1  |
| 84  | 65*                              | RU 24 03_0024  | 68.287 | 54.519 | -1.3 | -0.7 | 0.5 | -0.6 |
| 85  | ZS-12                            | RU 97 10_0001  | 67.411 | 63.396 | -0.2 | -0.9 | 0.6 | 0.7  |
| 86  | ZS-16                            | RU 98 10_0002  | 67.390 | 63.414 | -0.1 | -0.9 | 0.6 | 0.8  |
| 87  | ZS-34                            | RU 99 10_0003  | 67.397 | 63.381 | 0.3  | -0.9 | 0.6 | 1.2  |
| 88  | ZS-83a                           | RU 100 10_0004 | 67.396 | 63.365 | -0.1 | -0.9 | 0.6 | 0.8  |
| 89  | ZS-115                           | RU 101 10_0005 | 67.390 | 63.327 | -0.1 | -0.9 | 0.6 | 0.8  |
| 90  | ZS-117                           | RU 102 10_0006 | 67.392 | 63.339 | -0.1 | -0.9 | 0.6 | 0.8  |
| 91  | ZS-124*                          | RU 103 10_0007 | 67.397 | 63.375 | -1.4 | -0.9 | 0.6 | -0.5 |
| 92  | ZS-169                           | RU 104 10_0008 | 67.396 | 63.369 | 0.1  | -0.9 | 0.6 | 1.0  |
| 93  | ZS-227                           | RU 105 10_0009 | 67.392 | 63.401 | -1.1 | -0.9 | 0.6 | -0.2 |
| 94  | ZS-247                           | RU 106 10_0010 | 67.398 | 63.368 | -0.2 | -0.9 | 0.6 | 0.7  |
| 95  | DS-3/VII-74*                     | RU 107 10_0011 | 67.396 | 63.372 | -0.5 | -0.9 | 0.6 | 0.4  |
| 96  | 8C                               | RU 108 10_0012 | 67.394 | 63.366 | -0.1 | -0.9 | 0.6 | 0.8  |
| 97  | Ya1*                             | RU 109 10_0013 | 67.507 | 64.004 | -0.3 | -0.8 | 0.6 | 0.5  |
| 98  | Ya3                              | RU 110 10_0014 | 67.507 | 64.003 | -0.6 | -0.8 | 0.6 | 0.2  |
| 99  | SH-3                             | RU 111 10_0015 | 67.388 | 64.894 | -0.1 | -1.4 | 0.6 | 1.3  |
| 100 | SH-14                            | RU 112 10_0016 | 67.370 | 64.897 | -0.4 | -1.6 | 0.6 | 1.2  |
| 101 | SH-15                            | RU 113 10_0017 | 67.371 | 64.891 | -1.5 | -1.6 | 0.6 | 0.1  |
| 102 | ZS-25                            | RU 114 10_0018 | 67.400 | 63.515 | -0.6 | -0.9 | 0.6 | 0.3  |
| 103 | VK-1615*                         | RU 115 10_0019 | 67.468 | 63.360 | -0.3 | -0.9 | 0.6 | 0.6  |
| 104 | VK-1618                          | RU 116 10_0020 | 67.446 | 63.410 | 0.4  | -0.9 | 0.6 | 1.3  |
| 105 | EK-67                            | RU 117 10_0021 | 67.383 | 63.333 | 0.1  | -0.9 | 0.6 | 1.0  |
| 106 | UP-35                            | RU 118 10_0022 | 67.405 | 64.484 | -0.7 | -1.1 | 0.7 | 0.4  |
| 107 | K-887                            | RU 119 10_0023 | 67.549 | 64.174 | 1.1  | -1.1 | 0.6 | 2.2  |
| 108 | 35                               | RU 120 10_0024 | 67.962 | 61.496 | -1.8 | -1.1 | 0.6 | -0.7 |
| 109 | 37                               | RU 121 10_0025 | 67.957 | 61.505 | -1.6 | -1.1 | 0.6 | -0.5 |
| 110 | 100                              | RU 122 10_0026 | 67.955 | 61.501 | -4.1 | -1.1 | 0.6 | -3.0 |
| 111 | 106                              | RU 123 10_0027 | 67.962 | 61.521 | 1.4  | -1.1 | 0.6 | 2.5  |
| 112 | 23                               | RU 124 10_0028 | 68.256 | 65.808 | 0.5  | -1.6 | 0.6 | 2.1  |
| 113 | 30                               | RU 125 10_0029 | 68.257 | 65.801 | 0.0  | -1.6 | 0.6 | 1.6  |
| 114 | 32                               | RU 126 10_0030 | 68.256 | 65.802 | 0.5  | -1.6 | 0.6 | 2.1  |
| 115 | 34                               | RU 127 10_0031 | 68.262 | 65.811 | -0.1 | -1.7 | 0.6 | 1.6  |
| 116 | (R9)                             | RU 128 10_0032 | 67.341 | 62.350 | 0.5  | -0.6 | 0.6 | 1.1  |
| 117 | (R53)                            | RU 129 10_0033 | 67.332 | 62.373 | 0.1  | -0.6 | 0.6 | 0.7  |
| 118 | (R55)                            | RU 130 10_0034 | 67.329 | 62.379 | -1.8 | -0.6 | 0.6 | -1.2 |
| 119 | (R57)*                           | RU 131 10_0035 | 67.325 | 62.390 | -1.9 | -0.6 | 0.6 | -1.3 |
| 120 | (R64)                            | RU 132 10_0036 | 67.347 | 62.377 | -2.2 | -0.6 | 0.6 | -1.6 |
| 121 | (R71)                            | RU 133 10_0037 | 67.346 | 62.337 | -2.0 | -0.6 | 0.6 | -1.4 |

|     |                       |                |        |        |      |      |     |      |
|-----|-----------------------|----------------|--------|--------|------|------|-----|------|
| 122 | (R83)                 | RU 134 10_0038 | 67.338 | 62.337 | 0.0  | -0.6 | 0.6 | 0.6  |
| 123 | (R92)*                | RU 135 10_0039 | 67.322 | 62.390 | -2.4 | -0.6 | 0.6 | -1.8 |
| 124 | KT-3b*                | RU 136 10_0042 | 68.280 | 62.543 | -1.3 | -1.1 | 0.6 | -0.2 |
| 125 | KT-4                  | RU 137 10_0043 | 68.278 | 62.531 | -0.8 | -1.1 | 0.6 | 0.3  |
| 126 | KT-5                  | RU 138 10_0044 | 68.264 | 62.492 | -2.4 | -1.2 | 0.6 | -1.2 |
| 127 | KT-8                  | RU 139 10_0045 | 68.260 | 62.479 | 0.1  | -1.2 | 0.6 | 1.3  |
| 128 | KT-16a                | RU 140 10_0046 | 68.246 | 62.434 | -0.1 | -1.2 | 0.6 | 1.1  |
| 129 | KT-17                 | RU 141 10_0047 | 68.244 | 62.429 | -1.2 | -1.2 | 0.6 | 0.0  |
| 130 | KT-18                 | RU 142 10_0048 | 68.238 | 62.410 | -2.7 | -1.2 | 0.6 | -1.5 |
| 131 | KT-22                 | RU 143 10_0049 | 68.271 | 62.499 | -1.9 | -1.2 | 0.6 | -0.7 |
| 132 | KT-27                 | RU 144 10_0050 | 68.294 | 62.588 | -1.1 | -1.1 | 0.6 | 0.0  |
| 133 | KT-14                 | RU 145 10_0051 | 68.255 | 62.461 | -1.3 | -1.2 | 0.6 | -0.1 |
| 134 | KT-21                 | RU 146 10_0052 | 68.274 | 62.515 | -1.8 | -1.2 | 0.6 | -0.6 |
| 135 | Ta-1 PACE/Tarfala*    | SE 01          | 67.917 | 18.633 | -2.4 | -3.4 | 1.7 | 1.0  |
| 136 | Ta-2 PACE/Tarfala*    | SE 02          | 67.917 | 18.633 | -2.4 | -3.4 | 1.7 | 1.0  |
| 137 | T2 Tavnvuoja*         | SE 03          | 68.462 | 20.902 | -0.3 | 0.3  | 0.5 | -0.6 |
| 138 | T10 Tavnvuoja*        | SE 04          | 68.462 | 20.902 | -0.4 | 0.3  | 0.5 | -0.7 |
| 139 | KF-1 Kursflaket* PYRN | SE 05          | 68.351 | 18.873 | -0.2 | 1.0  | 0.4 | -1.2 |
| 140 | KF-2 Kursflake * PYRN | SE 06          | 68.351 | 18.873 | -0.5 | 1.0  | 0.4 | -1.5 |
| 141 | SF-1 Storflaket* PYRN | SE 07          | 68.348 | 18.977 | -0.5 | 1.3  | 0.4 | -1.8 |
| 142 | SF-2 Storflaket* PRYN | SE 08          | 68.347 | 18.974 | -0.3 | 1.3  | 0.4 | -1.6 |
| 143 | SF-3 Storflaket* PYRN | SE 10          | 68.347 | 18.975 | -0.6 | 1.3  | 0.4 | -1.9 |
